# Supplementary material for: Cells isolated from residual intracranial tumors after treatment express iPSC genes and possess neural lineage differentiation plasticity
Source: PubMed Central journal article supplement — eBioMedicine. 2018 Sep 27;36:281–92. doi: 10.1016/j.ebiom.2018.09.019 (PMC6197705; doi:10.1016/j.ebiom.2018.09.019), 2018-09-27

**Fig. S1**

**a**

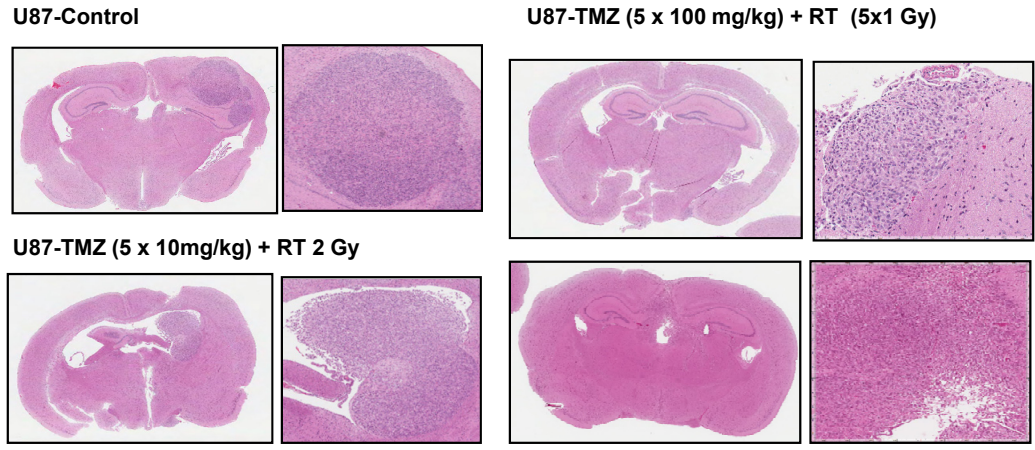

**b**

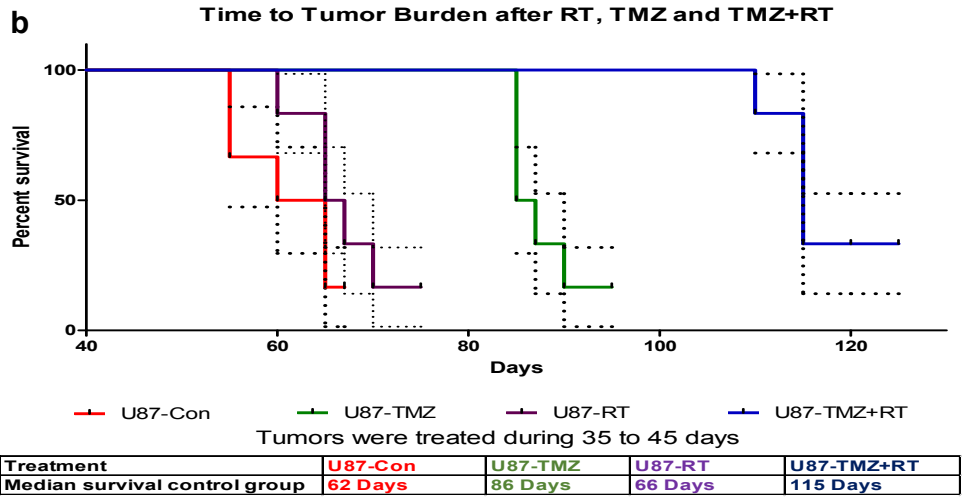

**c**

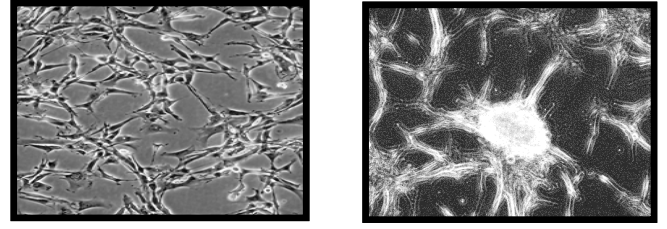

**d**

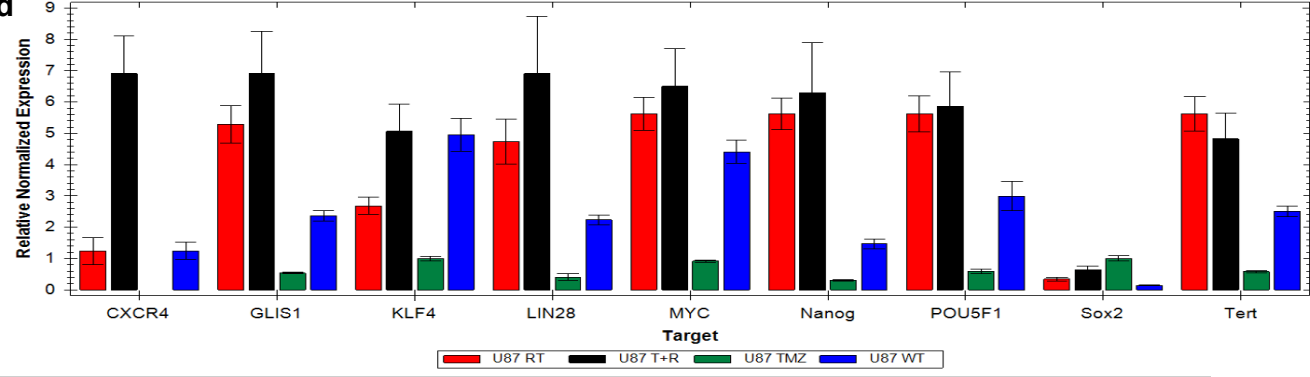

**e**

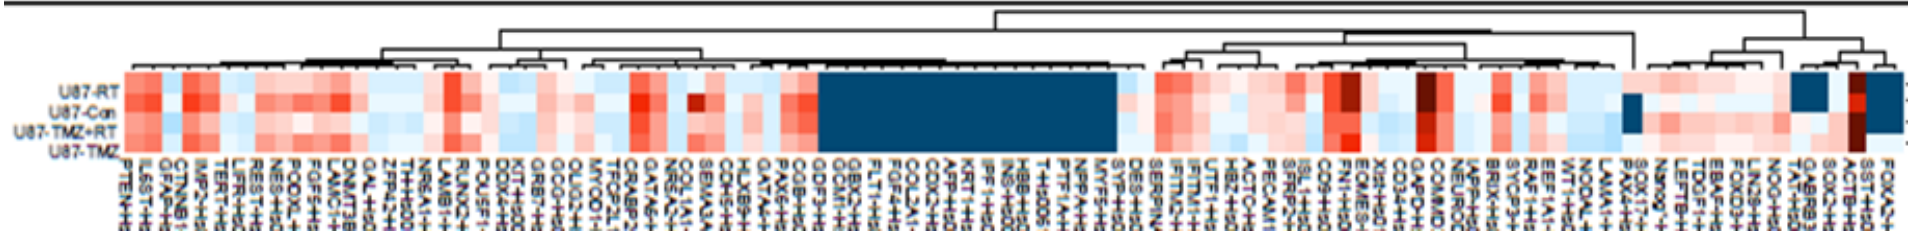

**Fig. S2**

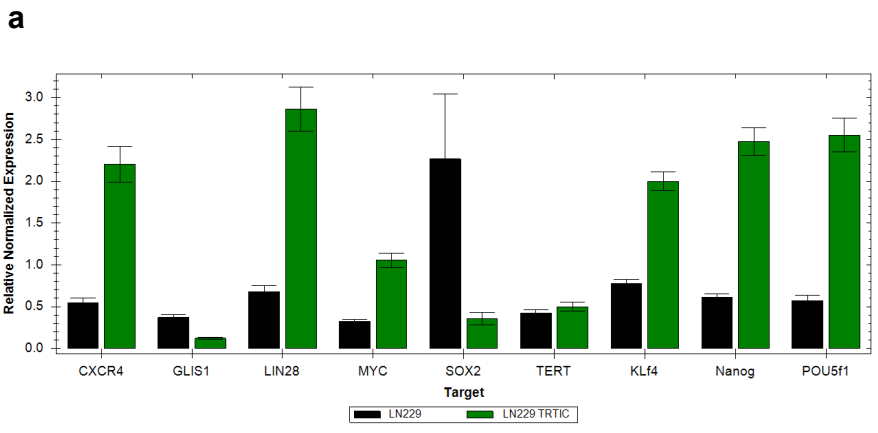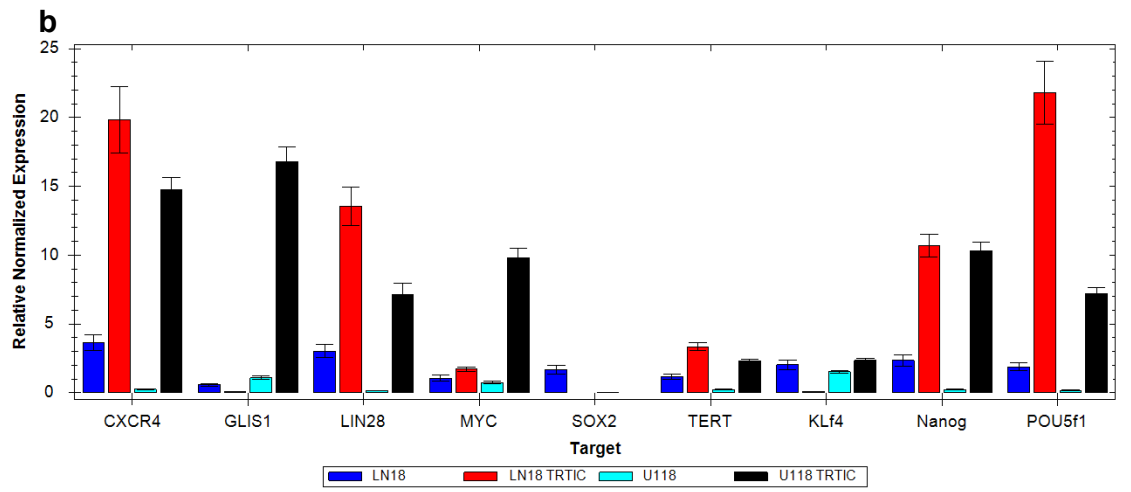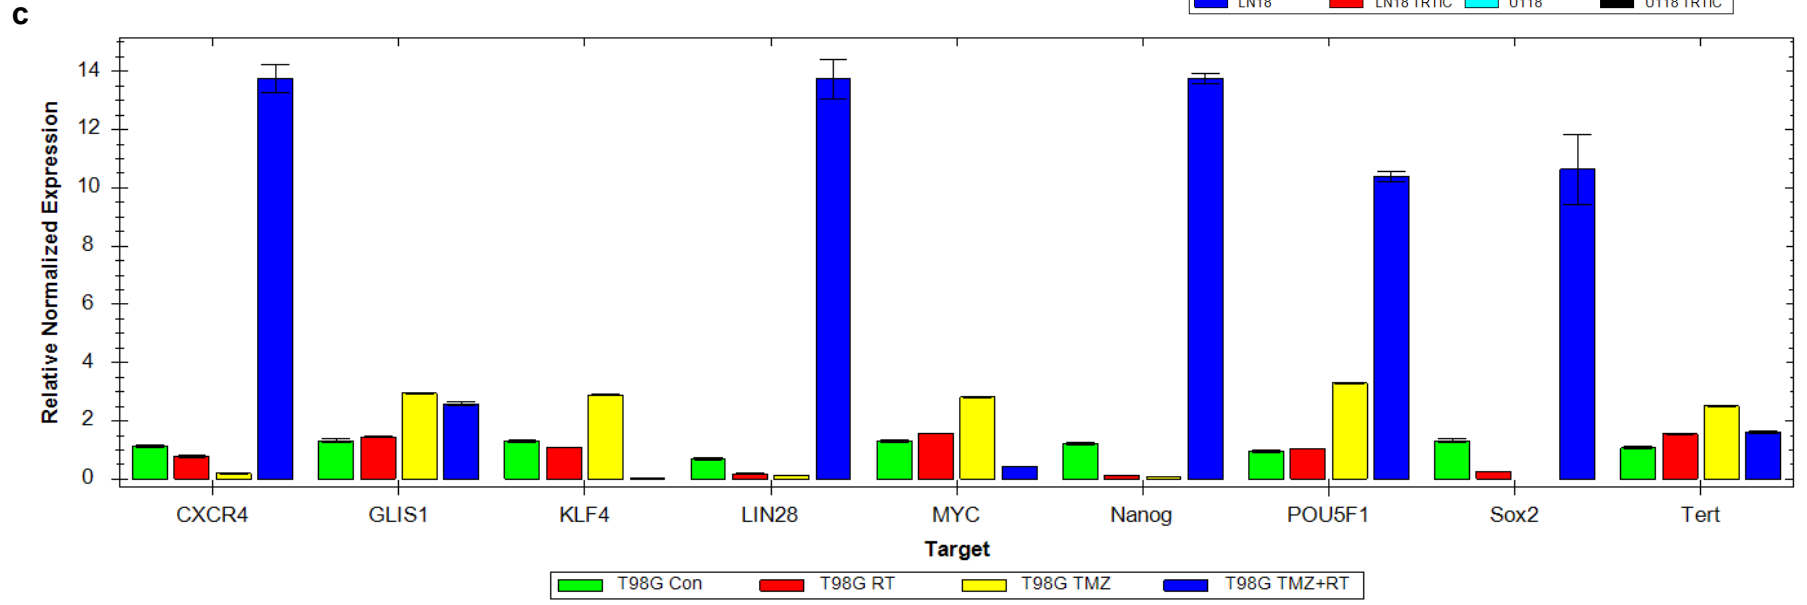

**Fig. S3**

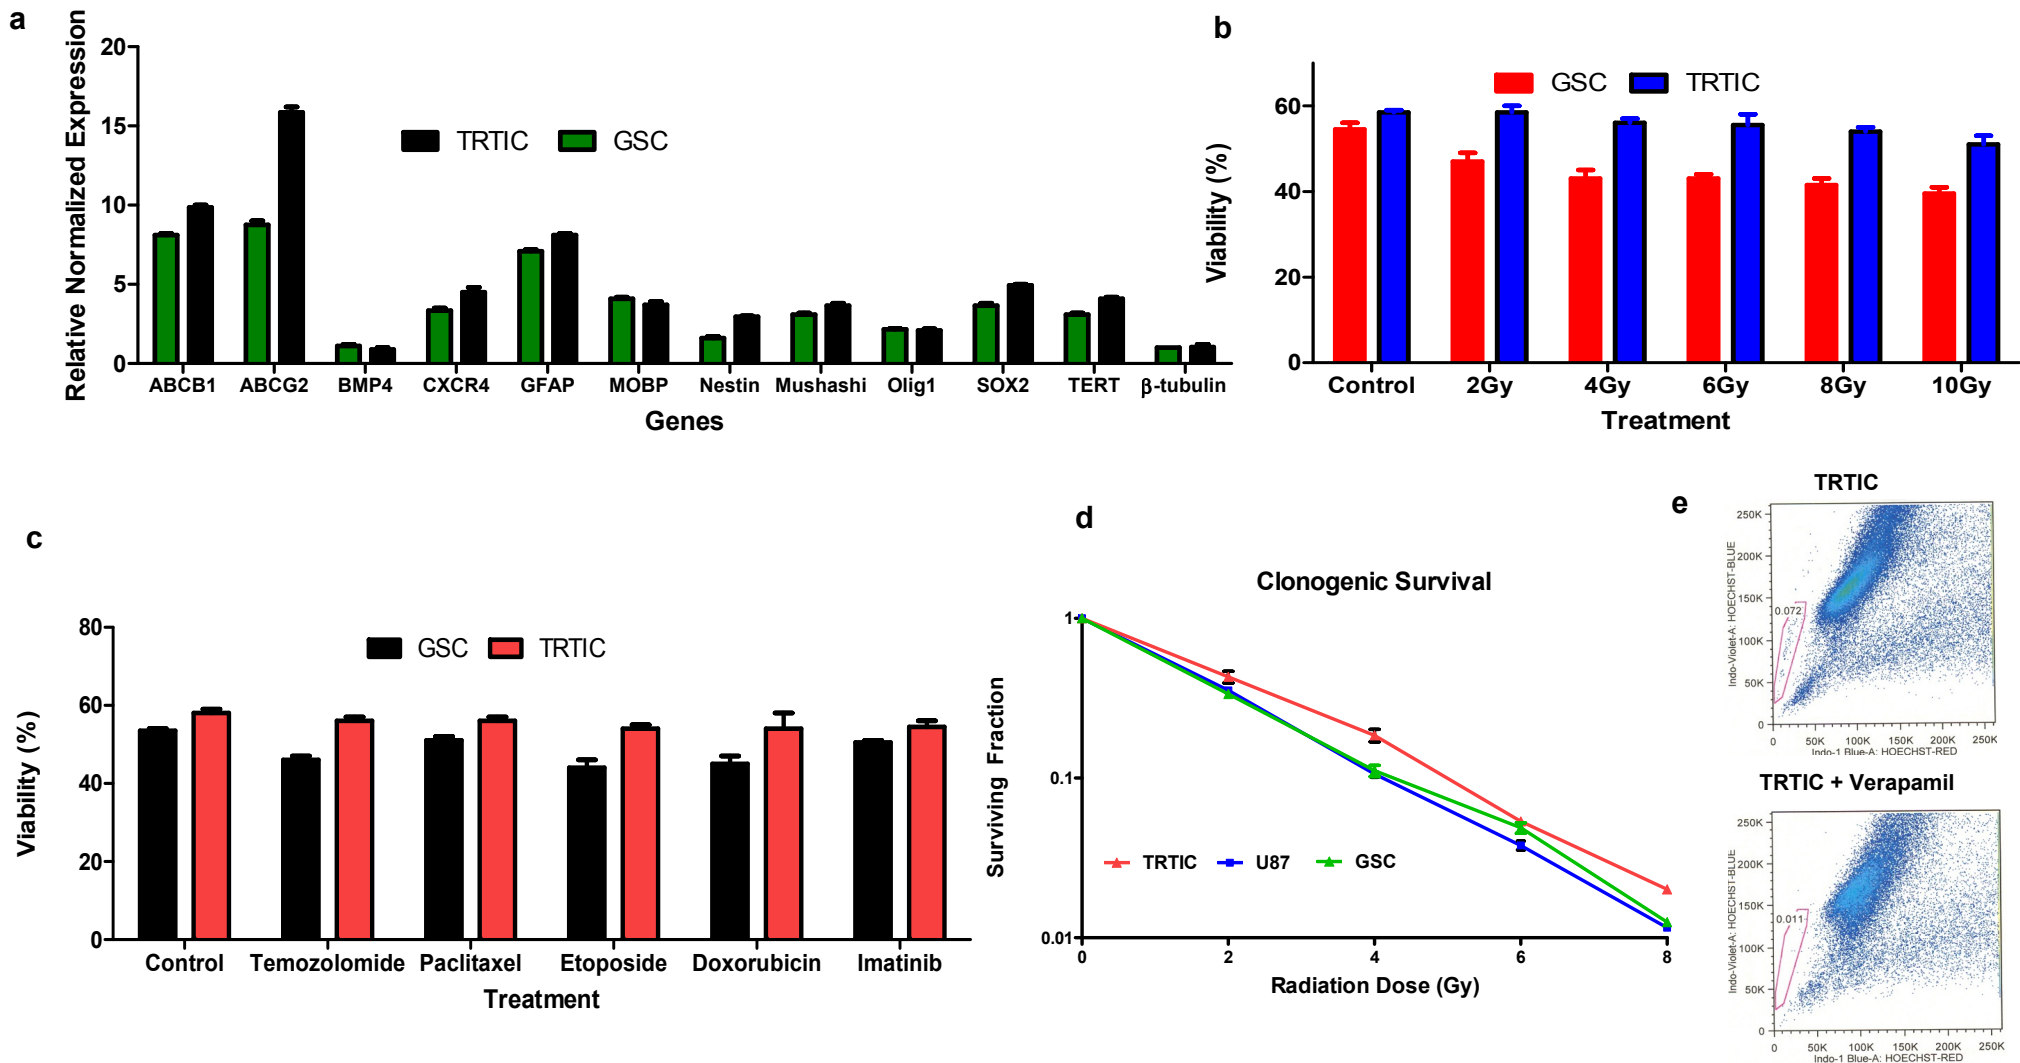

Fig. S4

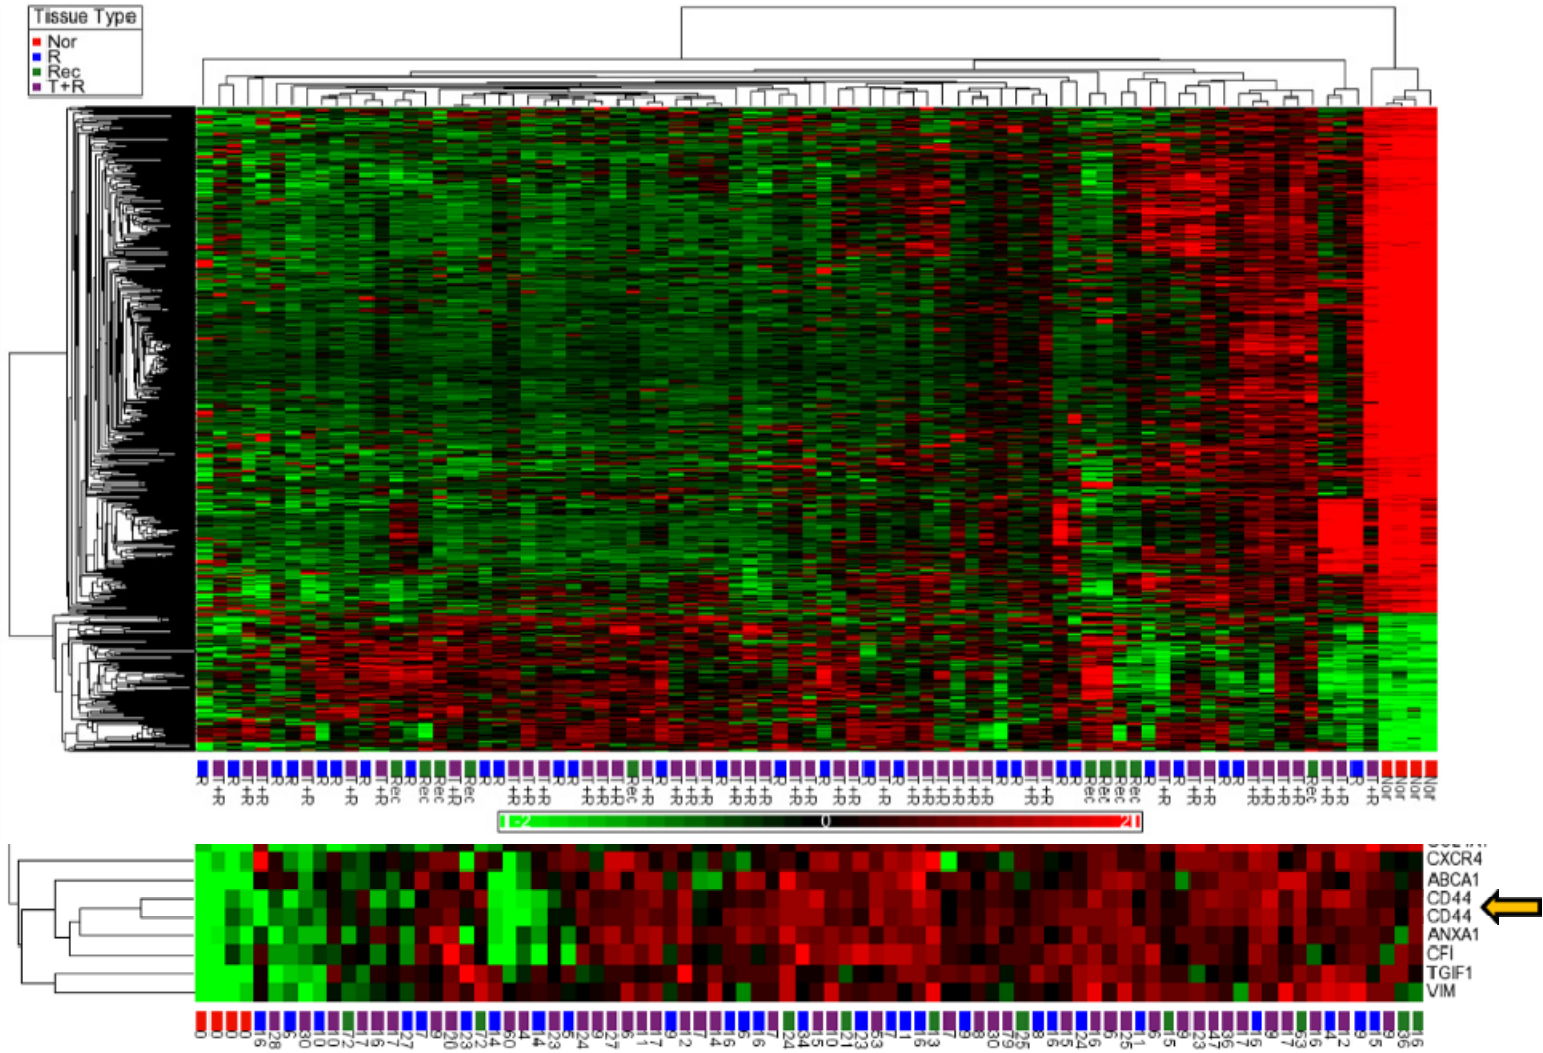

Nor=Normal; R=Radiation Treatment; Rec=Recurrent tumor; T+R=Combined Temozolamide and Radiation treatment

Fig. S5

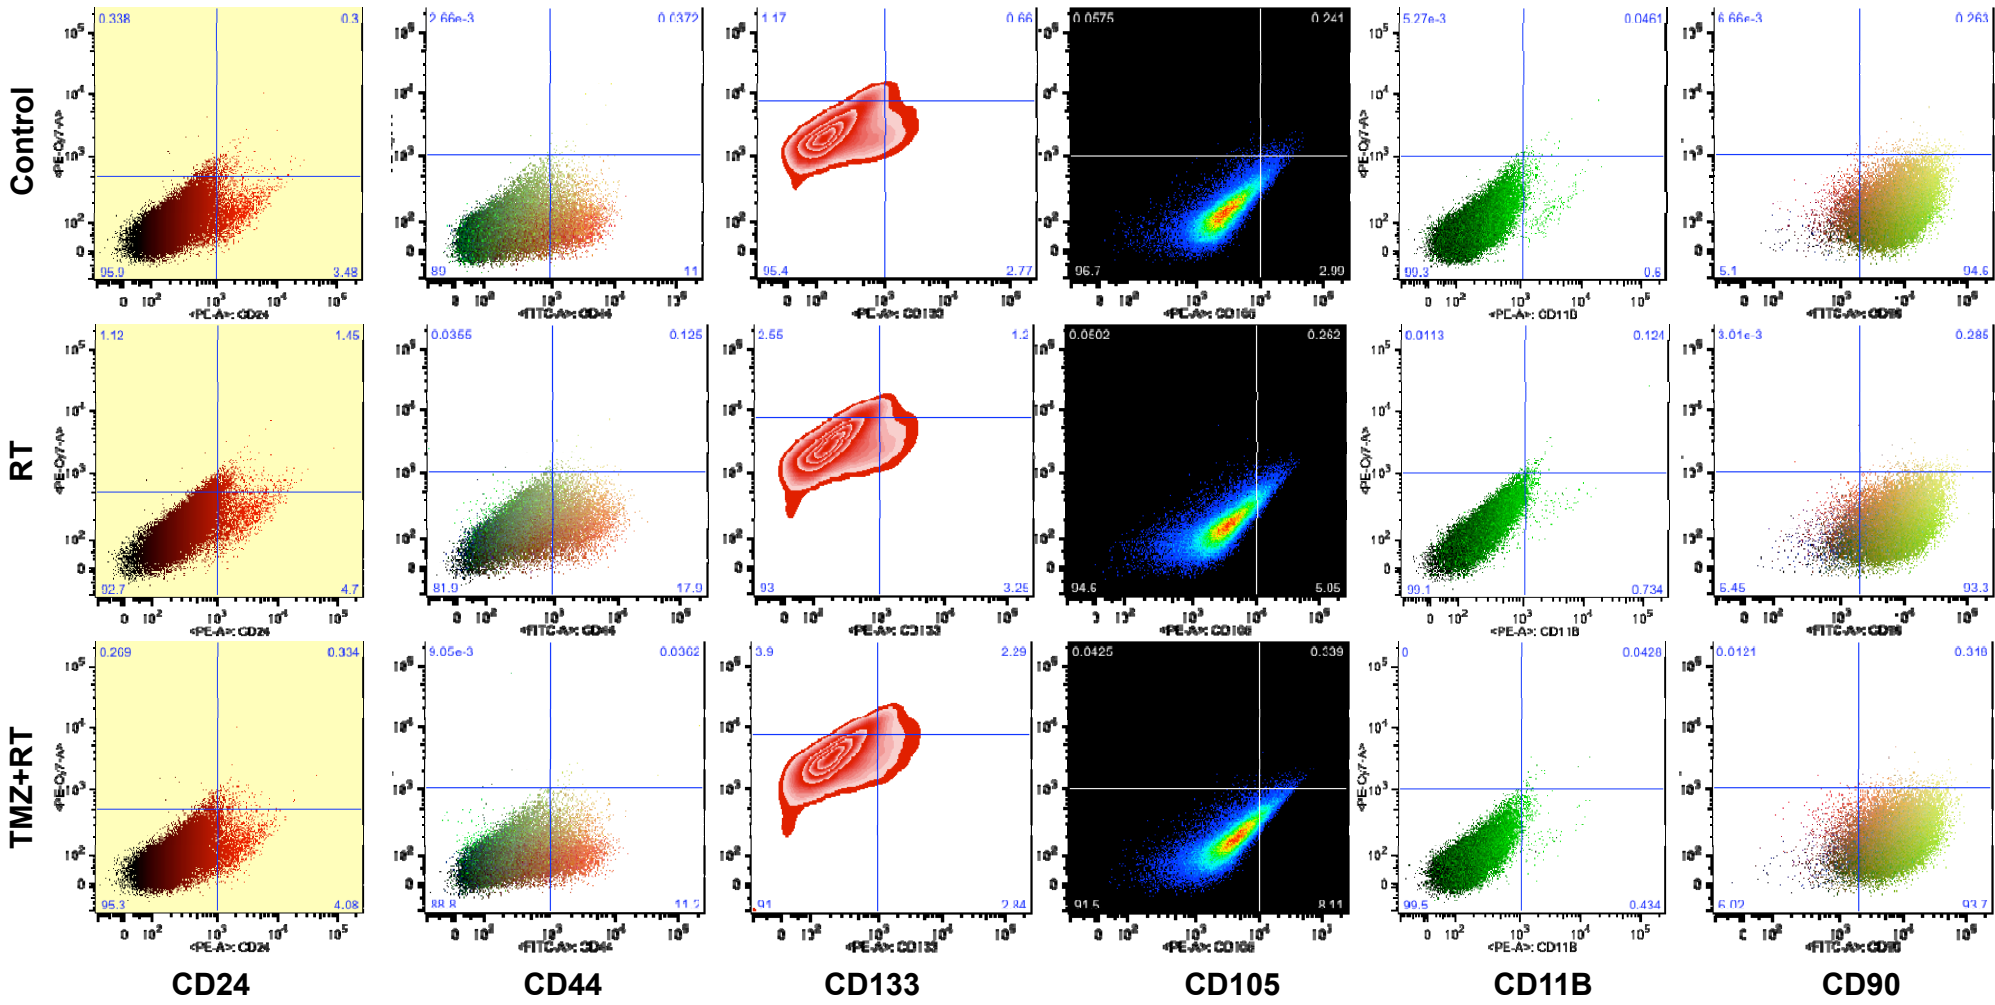



Fig. S6

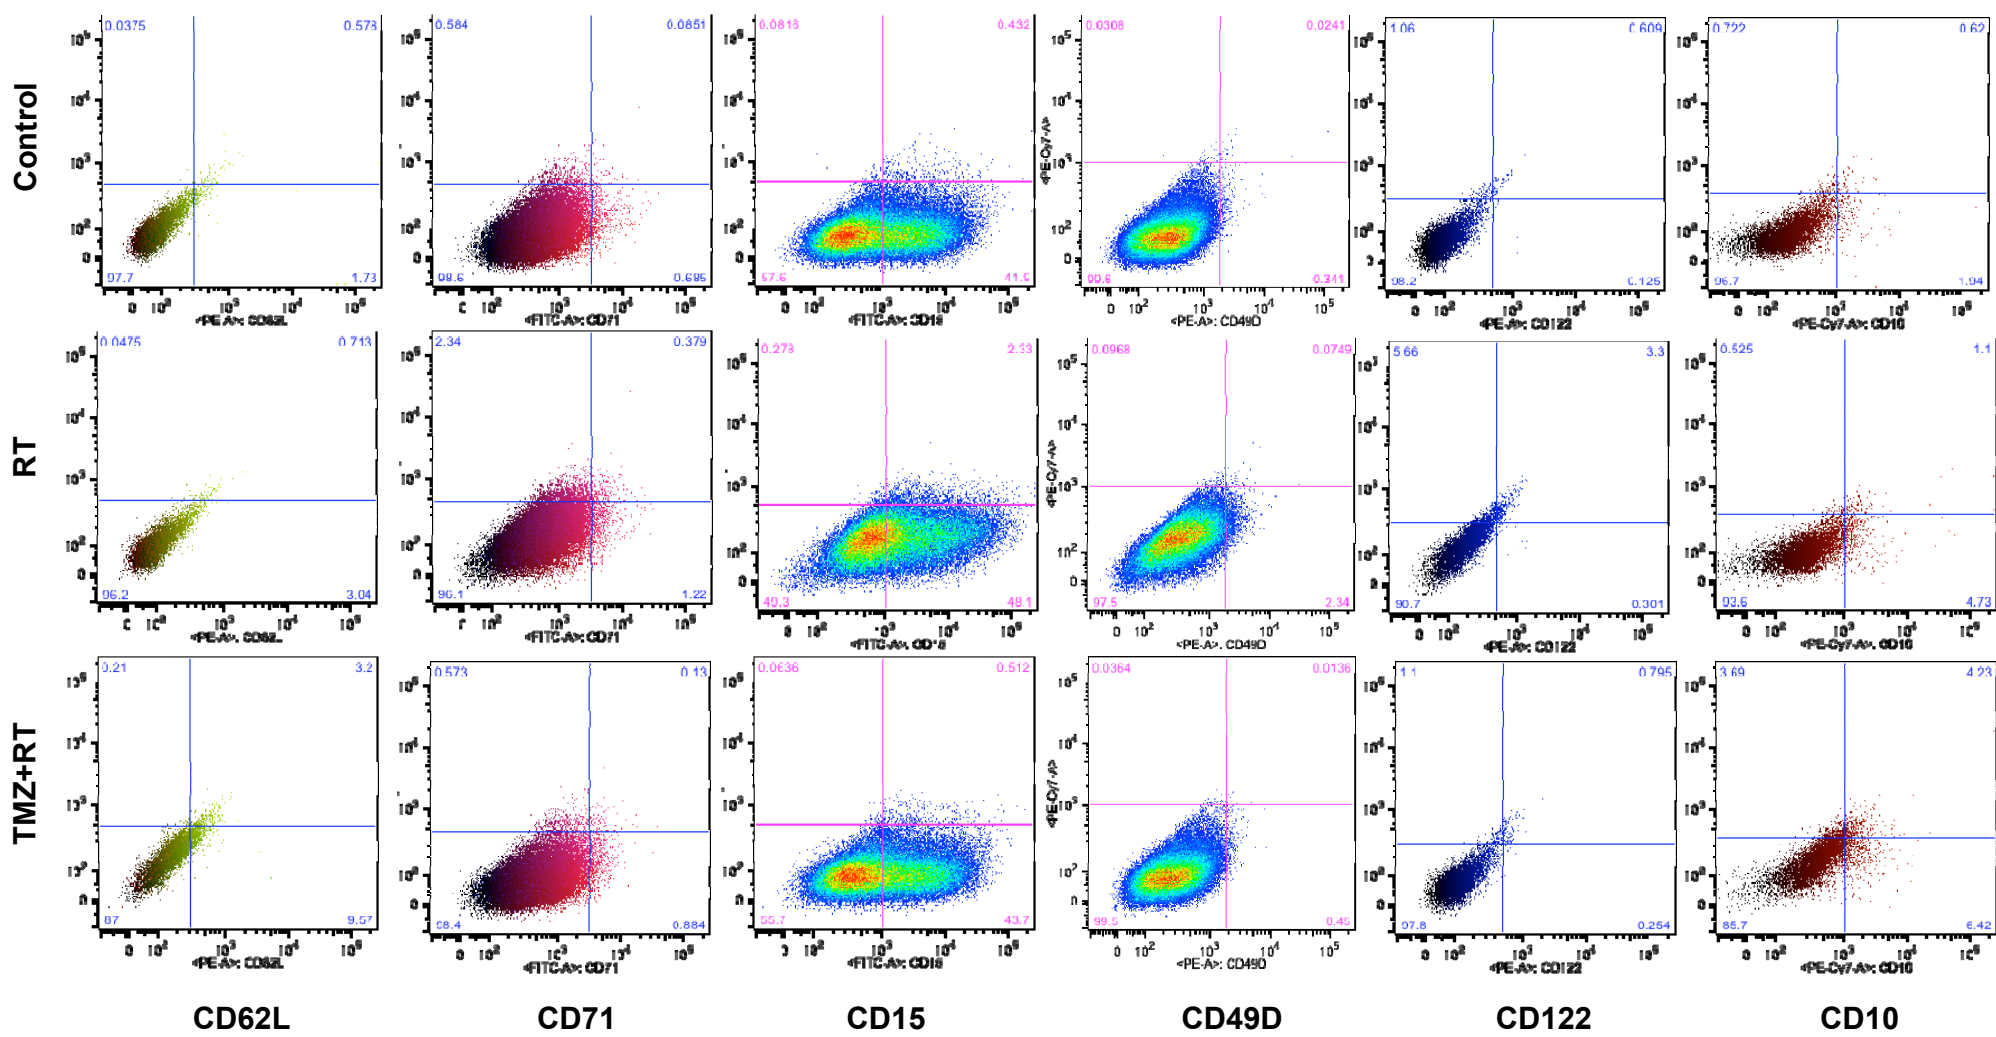

**Fig. S7**

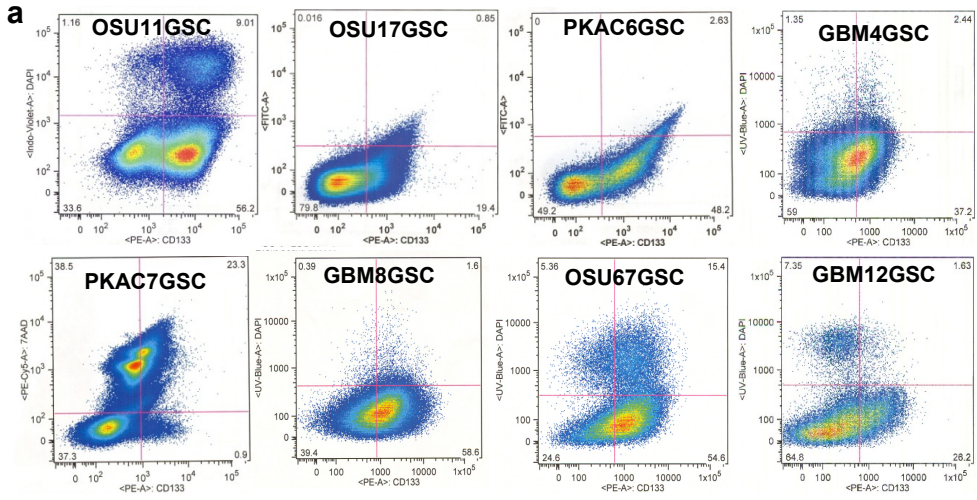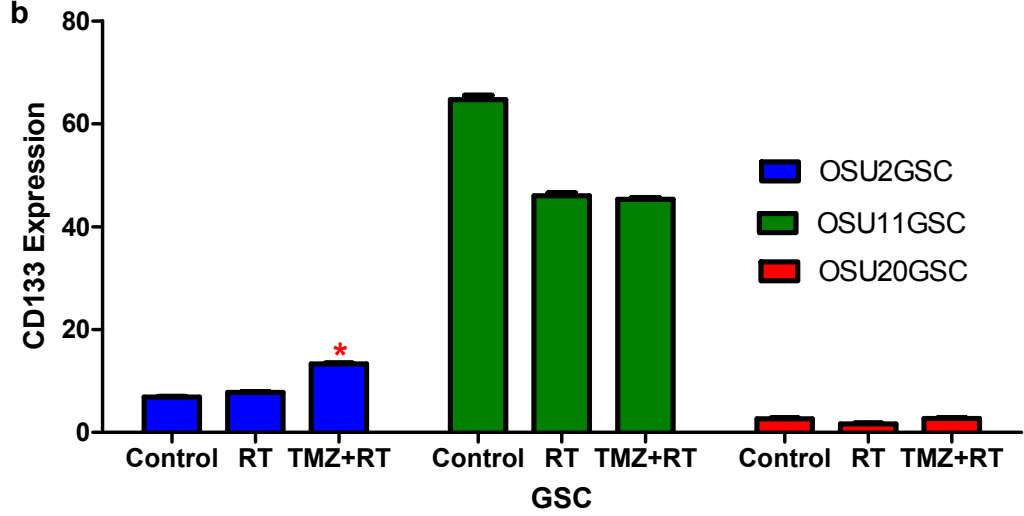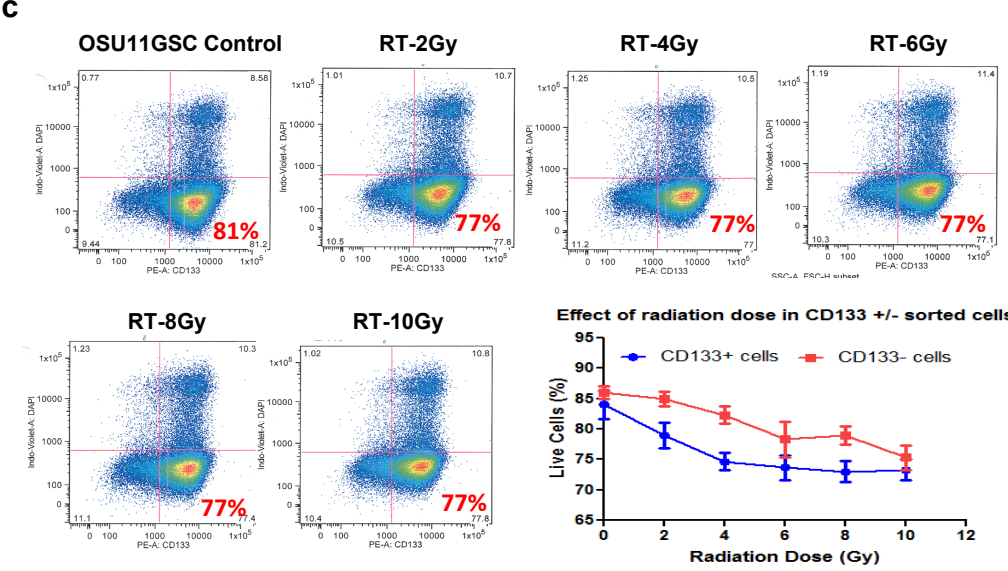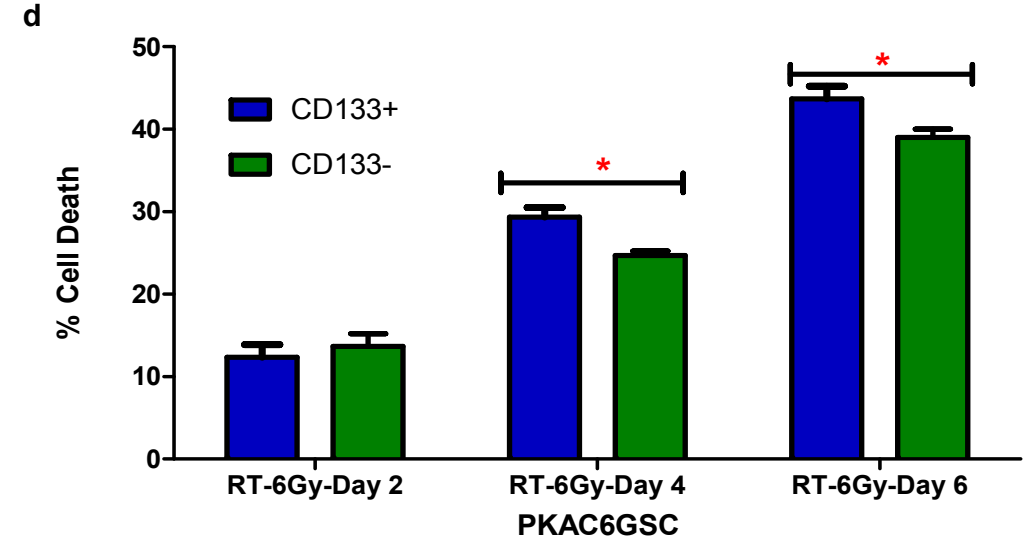

**Fig. S8**

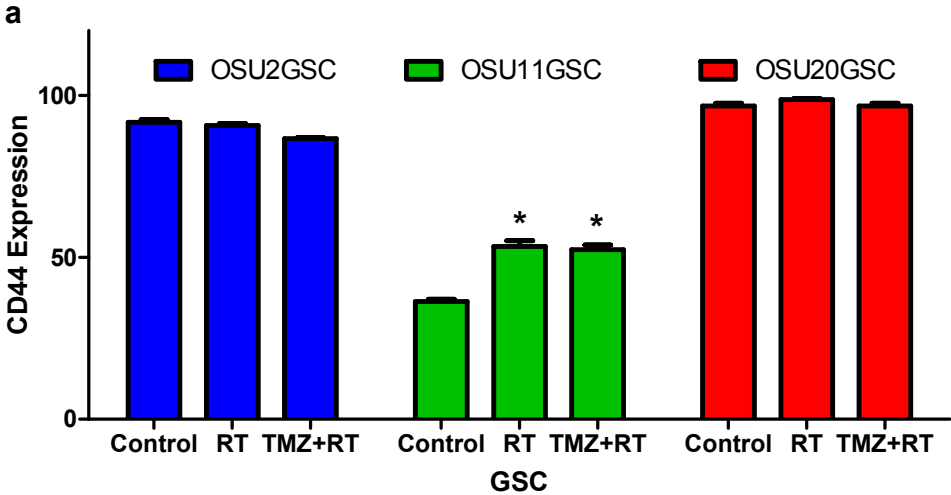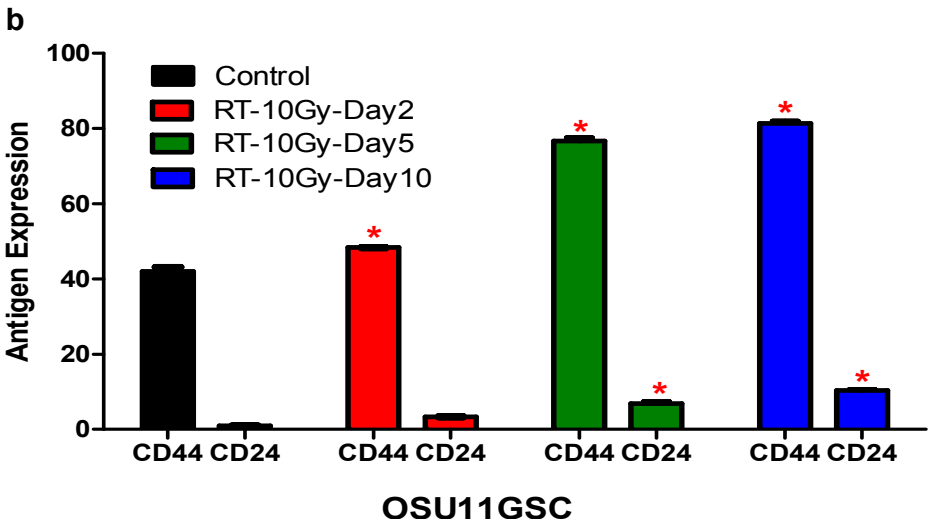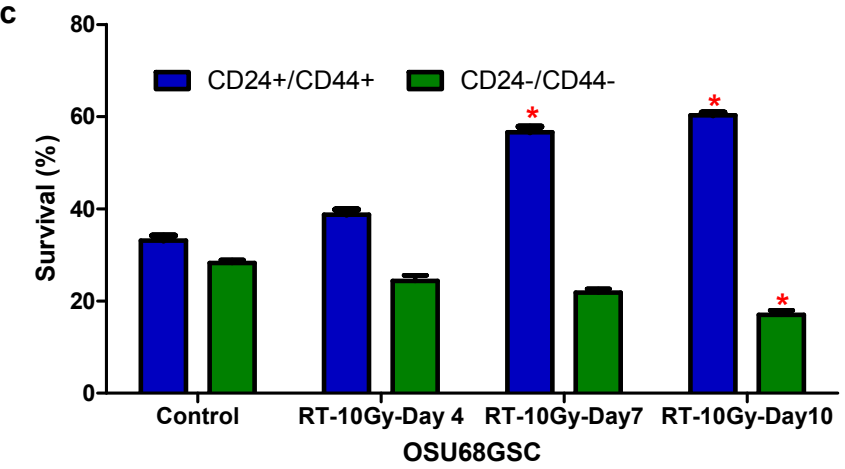



Fig. S9

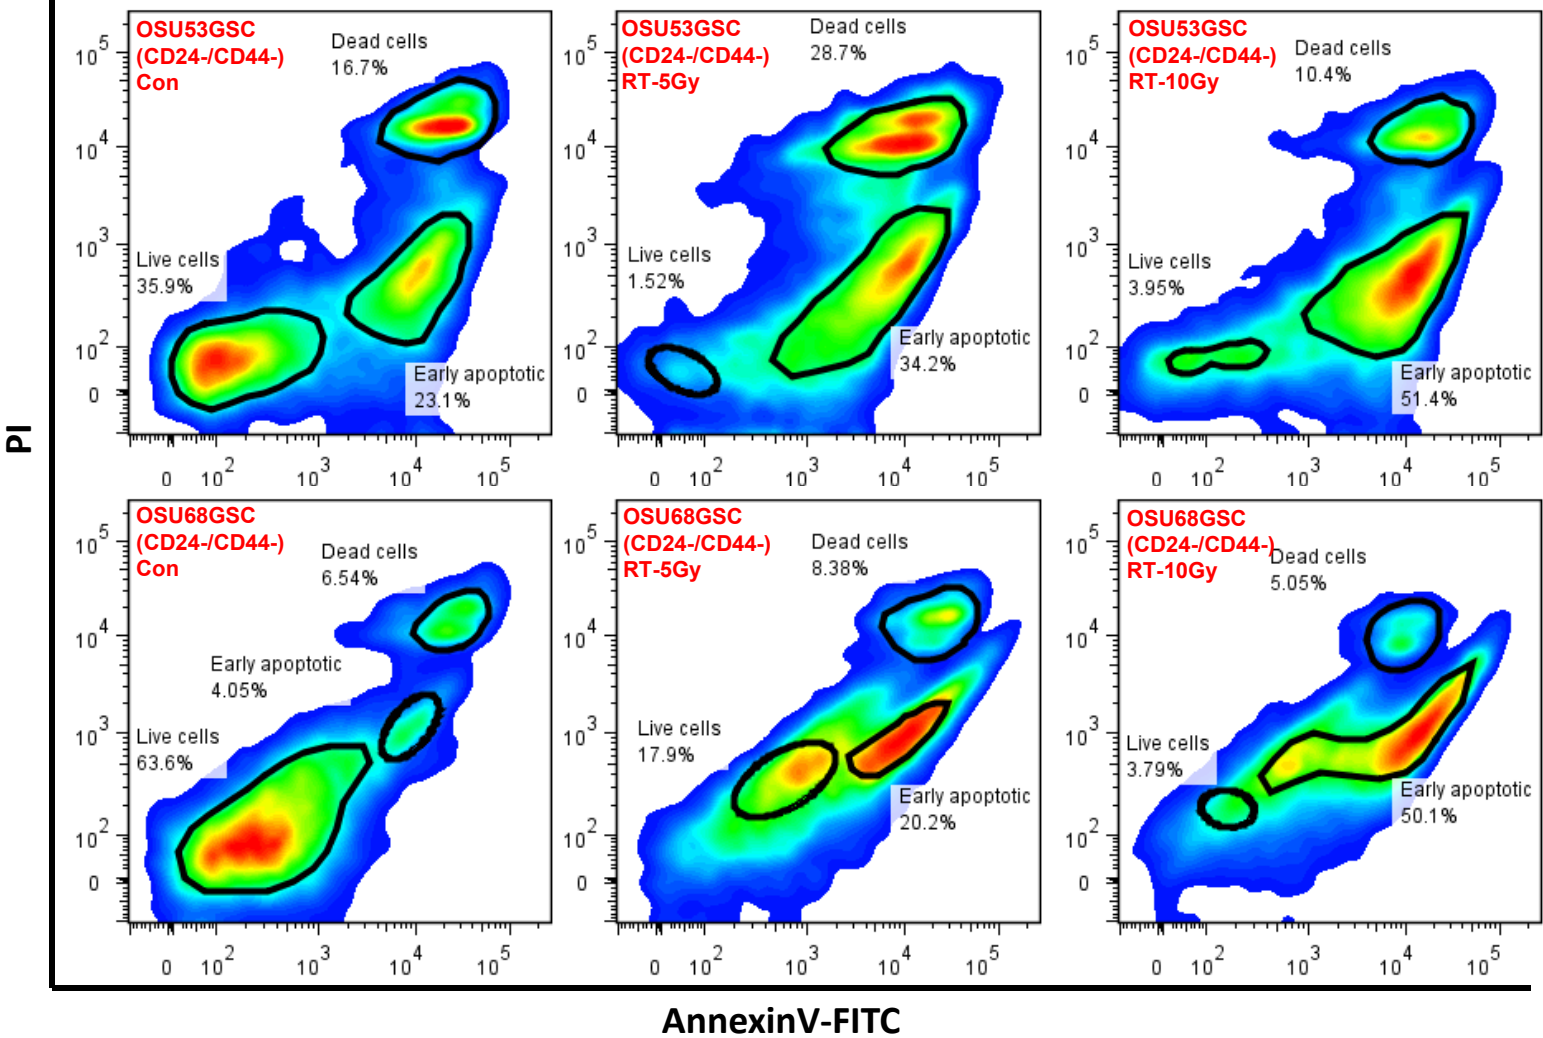

Supplement: mmc1.pdf [file mmc1.pdf]
